# Supplementary material for: Clinical outcomes of hemodialysis patients in a public-private partnership care framework in Italy: a retrospective cohort study
Source: PubMed Central journal article supplement (PMC6359808; doi:10.1186/s12882-019-1224-2), 2019-02-01
Supplement: 12882_2019_1224_MOESM1_ESM.pdf [file 12882_2019_1224_MOESM1_ESM.pdf]

## Prevalent patients

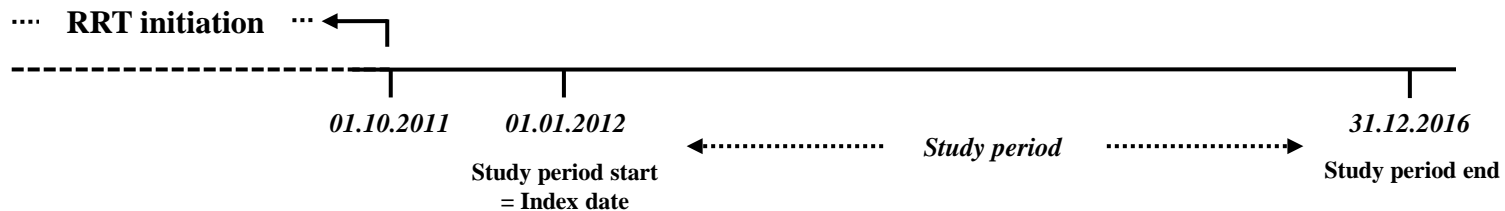

\*Index date =  
date of first HD treatment in Seriate dialysis unit within 30 days after RRT initiation

## Incident patients

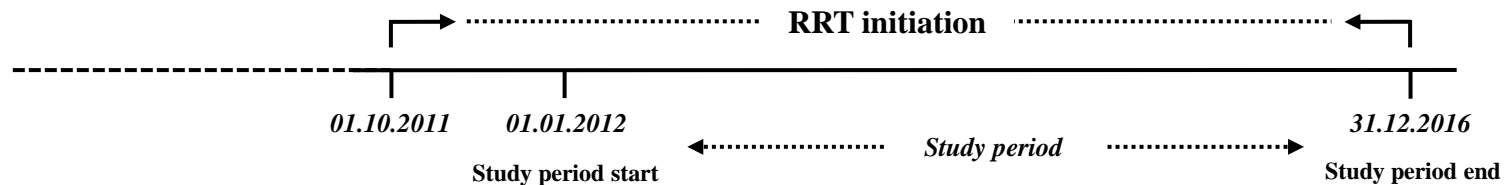

**Figure S1**
