# Supplementary material for: Clinical outcomes of hemodialysis patients in a public-private partnership care framework in Italy: a retrospective cohort study
Source: PubMed Central journal article supplement (PMC6359808; doi:10.1186/s12882-019-1224-2), 2019-02-01
Supplement: 12882_2019_1224_MOESM2_ESM.pdf [file 12882_2019_1224_MOESM2_ESM.pdf]

**Table S1.** Cause of renal disease of the study patients

|                                              | <b>Prevalent patients</b> |       | <b>Incident patients</b> |       | <b>All patients</b> |       |
|----------------------------------------------|---------------------------|-------|--------------------------|-------|---------------------|-------|
|                                              | <i>N</i>                  | %     | <i>N</i>                 | %     | <i>N</i>            | %     |
| Diabetes mellitus                            | 22                        | 11.2  | 45                       | 22.1  | 67                  | 16.7  |
| Atherosclerosis/Hypertension                 | 16                        | 8.1   | 14                       | 6.9   | 30                  | 7.5   |
| Primitive Glomerular Disease                 | 19                        | 9.6   | 12                       | 5.9   | 31                  | 7.7   |
| Polycystic/Multicistic kidney disease        | 14                        | 7.1   | 10                       | 4.9   | 24                  | 6.0   |
| Interstitial kidney diseases                 | 17                        | 8.6   | 10                       | 4.9   | 27                  | 6.7   |
| Systemic disease (ICD-10 codes M31.-/ E85.-) | 4                         | 2.0   | 3                        | 1.5   | 7                   | 1.7   |
| Cancer (kidney/ urinary tract)               | 4                         | 2.0   | 3                        | 1.5   | 7                   | 1.7   |
| Other/Unknown etiology <sup>1</sup>          | 101                       | 51.3  | 107                      | 52.5  | 208                 | 51.9  |
| Total                                        | 197                       | 100.0 | 204                      | 100.0 | 401                 | 100.0 |

<sup>1</sup>Mainly late referral patients. N = number of patients
