# Supplementary material for: Clinical outcomes of hemodialysis patients in a public-private partnership care framework in Italy: a retrospective cohort study
Source: PubMed Central journal article supplement (PMC6359808; doi:10.1186/s12882-019-1224-2), 2019-02-01
Supplement: 12882_2019_1224_MOESM3_ESM.pdf [file 12882_2019_1224_MOESM3_ESM.pdf]

**Table S2.** Use of medication at least once during the study period

| <b>Medication</b>                 | <b>Prevalent patients</b> | <b>Incident patients</b> | <b>All patients</b> |
|-----------------------------------|---------------------------|--------------------------|---------------------|
|                                   | <b>%</b>                  | <b>%</b>                 | <b>%</b>            |
| Erythropoiesis-stimulating agents | 90.4                      | 87.3                     | 88.8                |
| Intravenous iron                  | 94.9                      | 87.7                     | 91.3                |
| Statins                           | 38.1                      | 47.5                     | 42.9                |
| Antihypertensive drugs            |                           |                          |                     |
| ACE-inhibitors                    | 22.3                      | 11.8                     | 17.0                |
| Beta-blockers                     | 50.8                      | 50.5                     | 50.6                |
| Other                             | 57.9                      | 71.6                     | 64.8                |
| Antidiabetic drugs                |                           |                          |                     |
| Insulin                           | 16.2                      | 27.5                     | 21.9                |
| Oral anti-diabetic drugs          | 3.0                       | 6.4                      | 4.7                 |
| Phosphate binders                 |                           |                          |                     |
| Calcium acetate/carbonate         | 0.0                       | 0.0                      | 0.0                 |
| Sevelamer                         | 13.7                      | 10.8                     | 12.2                |
| Other phosphate binders           | 6.1                       | 2.0                      | 4.0                 |
| Vitamin D and analogs             |                           |                          |                     |
| Calcitriol                        | 61.9                      | 58.8                     | 60.3                |
| Paricalcitol                      | 12.7                      | 6.9                      | 9.7                 |
| Other                             | 82.7                      | 78.4                     | 80.5                |
| Cinacalcet                        | 15.2                      | 2.5                      | 8.7                 |
| Other drugs                       | 69.0                      | 63.7                     | 66.3                |

---

*ACE* Angiotensin Converting Enzyme
