# Supplementary material for: Clinical outcomes of hemodialysis patients in a public-private partnership care framework in Italy: a retrospective cohort study
Source: PubMed Central journal article supplement (PMC6359808; doi:10.1186/s12882-019-1224-2), 2019-02-01
Supplement: 12882_2019_1224_MOESM4_ESM.pdf [file 12882_2019_1224_MOESM4_ESM.pdf]

**Table S3.** Cumulative numbers of deaths, competing events and censored events in prevalent and incident patients every 6 months throughout the study period

| Follow-up time [month] | Prevalent patients |                      |            |                                   |                                  | Incident patients |                      |            |                                   |                                  |
|------------------------|--------------------|----------------------|------------|-----------------------------------|----------------------------------|-------------------|----------------------|------------|-----------------------------------|----------------------------------|
|                        | Patient month      | Patients at risk [n] | Deaths [n] | Competing events <sup>1</sup> [n] | Censored events <sup>2</sup> [n] | Patient month     | Patients at risk [n] | Deaths [n] | Competing events <sup>1</sup> [n] | Censored events <sup>2</sup> [n] |
| 0                      | 0                  | 197                  | 0          | 0                                 | 0                                | 0                 | 204                  | 0          | 0                                 | 0                                |
| 6                      | 3.6                | 184                  | 5          | 5                                 | 4                                | 5.9               | 156                  | 12         | 10                                | 27                               |
| 12                     | 11.9               | 164                  | 15         | 11                                | 8                                | 12.0              | 131                  | 19         | 12                                | 43                               |
| 18                     | 17.4               | 146                  | 27         | 15                                | 10                               | 18.0              | 110                  | 23         | 14                                | 58                               |
| 24                     | 22.7               | 136                  | 34         | 18                                | 10                               | 23.9              | 88                   | 28         | 16                                | 73                               |
| 30                     | 29.8               | 122                  | 43         | 22                                | 11                               | 30.0              | 71                   | 32         | 17                                | 85                               |
| 36                     | 35.6               | 110                  | 51         | 25                                | 12                               | 35.8              | 45                   | 35         | 18                                | 107                              |
| 42                     | 41.5               | 104                  | 56         | 26                                | 12                               | 42.0              | 30                   | 36         | 19                                | 120                              |
| 48                     | 47.9               | 90                   | 66         | 30                                | 12                               | 47.2              | 20                   | 37         | 21                                | 127                              |
| 54                     | 52.5               | 80                   | 74         | 31                                | 13                               | 52.7              | 9                    | 39         | 21                                | 136                              |
| 60                     | 60.0               | 74                   | 78         | 33                                | 13                               | 58.2              | 1                    | 39         | 22                                | 143                              |

<sup>1</sup>Kidney transplantation, treatment stop, change to peritoneal dialysis, and spontaneous recovery were defined as competing risks.

<sup>2</sup>Patients who transferred to another dialysis center or were discharged for other reasons were censored at the date of transfer or discharge.
